# Supplementary material for: Photocurrent improvement in nanocrystalline Cu2ZnSnS4 photocathodes by introducing porous structures
Source: Royal Society of Chemistry journal article supplement (doi:10.1039/c3ta14096b), 2013-01-01
Supplement: c3ta14096b.pdf [file c3ta14096b.pdf]

# Supporting Information

## Photocurrent improvement on nanocrystalline $\text{Cu}_2\text{ZnSnS}_4$ photocathodes by introducing porous structure

Xin Wen, Wenjun Luo\*, Zhigang Zou\*

Ecomaterials and Renewable Energy Research Center, National Laboratory of Solid  
State Microstructures and Department of Physics, Nanjing University, Nanjing,  
210093, China.

\*To whom correspondence should be  
addressed, E-mail: [wjluo@nju.edu.cn](mailto:wjluo@nju.edu.cn), [zgrou@nju.edu.cn](mailto:zgrou@nju.edu.cn)

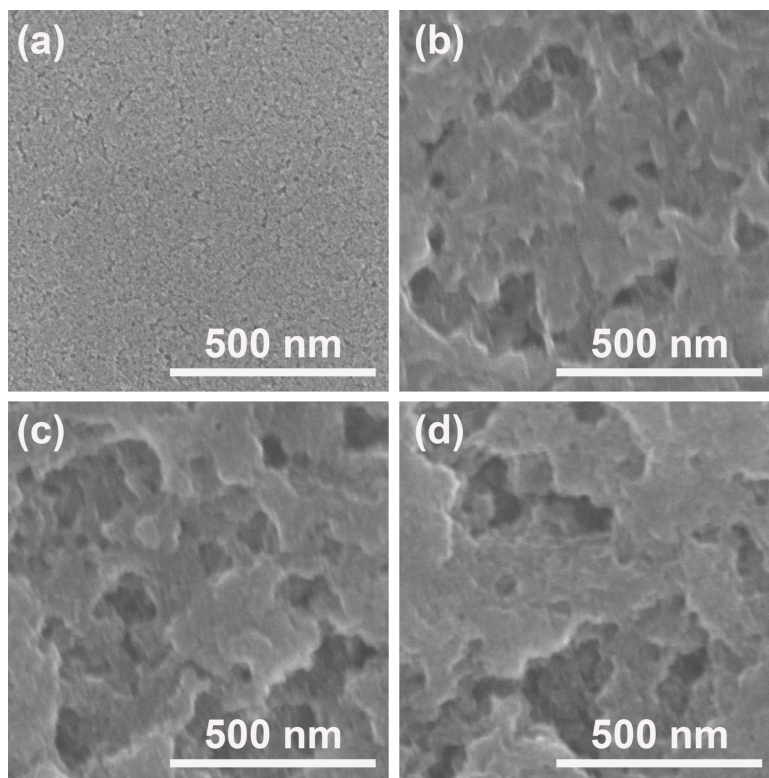

Fig. S1 SEM images of CZTS samples with S/Zn ratios of (a) 5, (b) 7.5, (c) 10 and (d) 12.5.

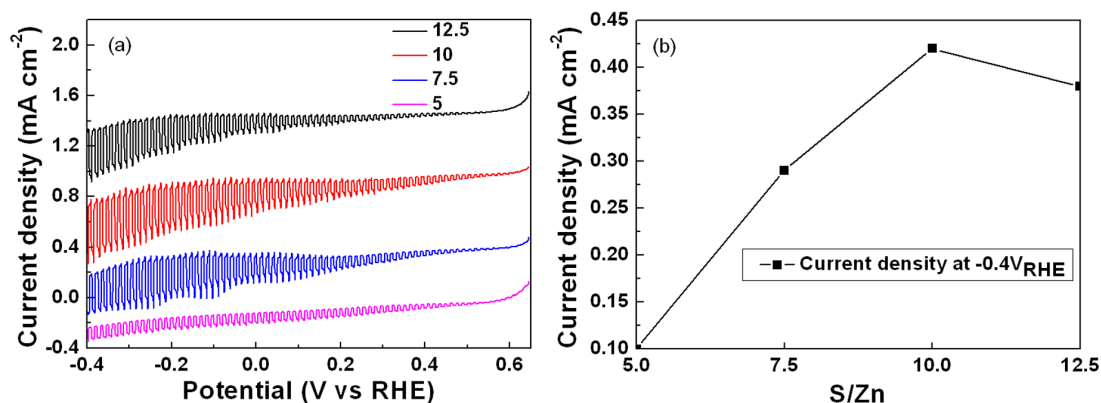

Fig. S2 (a) Current-potential curves of the samples with S/Zn ratios of 5, 7.5, 10 and 12.5 in 0.5 M Na<sub>2</sub>SO<sub>4</sub> (pH = 6) aqueous solution under Xe lamp illumination. (b) Photocurrent densities of the samples with S/Zn ratios of 5, 7.5, 10 and 12.5 at -0.4 V<sub>RHE</sub>.

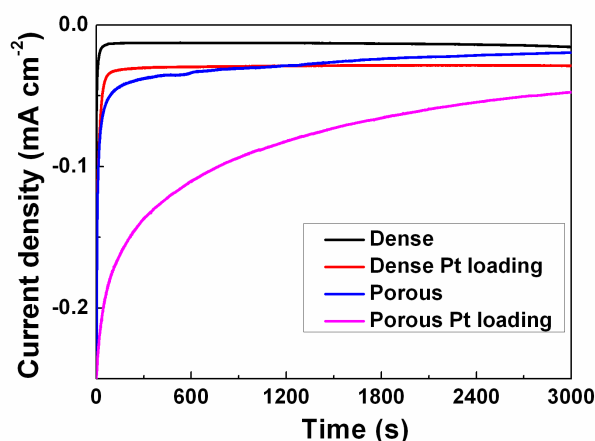

Fig. S3 Current-time curves of the dense and the porous samples (with and without Pt loading) at -0.2 V<sub>RHE</sub> in 0.5M Na<sub>2</sub>SO<sub>4</sub> (pH = 6) aqueous solution under Xe lamp illumination. Pt was loaded on the sample by scanning current-time curve at 0.22 V<sub>RHE</sub> in 1 mM H<sub>2</sub>PtCl<sub>6</sub> (pH = 3) for 12.5 mC cm<sup>-2</sup>.

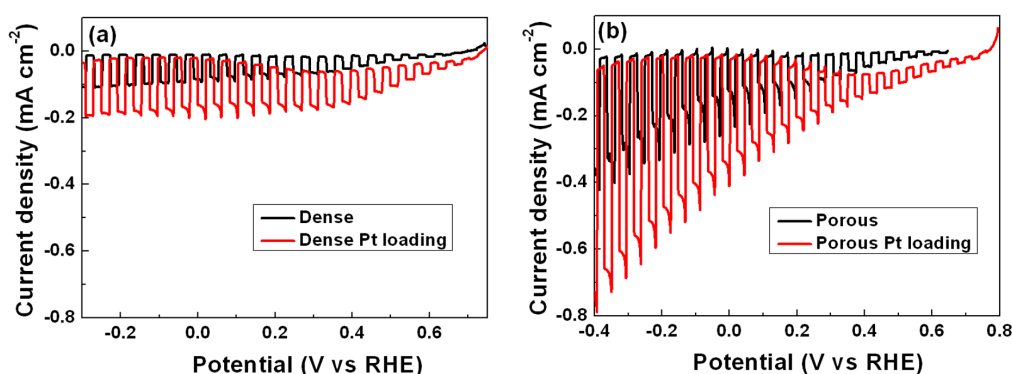

Fig. S4 (a) Current-potential curves of the dense sample before and after Pt loading measured in 0.5M Na<sub>2</sub>SO<sub>4</sub> (pH = 6) aqueous solution under Xe lamp illumination. (b) Current-potential curves of the porous sample before and after Pt loading measured in 0.5M Na<sub>2</sub>SO<sub>4</sub> (pH = 6) aqueous solution under Xe lamp illumination.

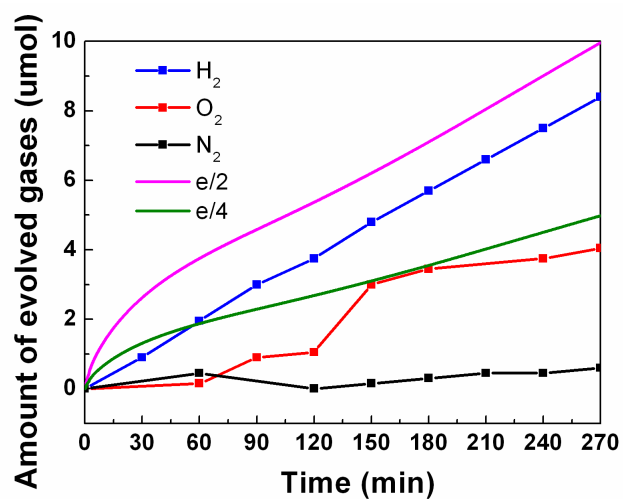

Fig. S5 Time courses of gas evolution from Pt loaded porous CZTS sample at  $-0.2 V_{\text{RHE}}$  in  $0.5 \text{ M Na}_2\text{SO}_4$  ( $\text{pH} = 6$ ) aqueous solution under Xe lamp illumination.
